# Supplementary material for: Resveratrol exerts antitumor effects by downregulating CD8+CD122+ Tregs in murine hepatocellular carcinoma
Source: PubMed Central journal article supplement — Oncoimmunology. 2020 Oct 24;9(1):1829346. doi: 10.1080/2162402X.2020.1829346 (PMC7588216; doi:10.1080/2162402x.2020.1829346), 2020-10-24
Supplement: KONI_A_1829346_SM5504.pdf [file KONI_A_1829346_SM5504.pdf]

## Supplementary Methods

### Flow cytometric assays of CD4<sup>+</sup>Foxp3<sup>+</sup> Tregs

Cells from draining lymph node (LN) and spleen were harvested and stained with APC-conjugated anti-CD4 (BioLegend) antibody, fixed and permeated by Foxp3/Transcription Factor Fixation/Permeabilization kits (eBioscience), and then stained with anti-Foxp3-PE (eBioscience) antibody. The frequency of CD4<sup>+</sup>Foxp3<sup>+</sup> Tregs was finally determined through FACSCalibur (BD Biosciences).

### Supplementary Figures

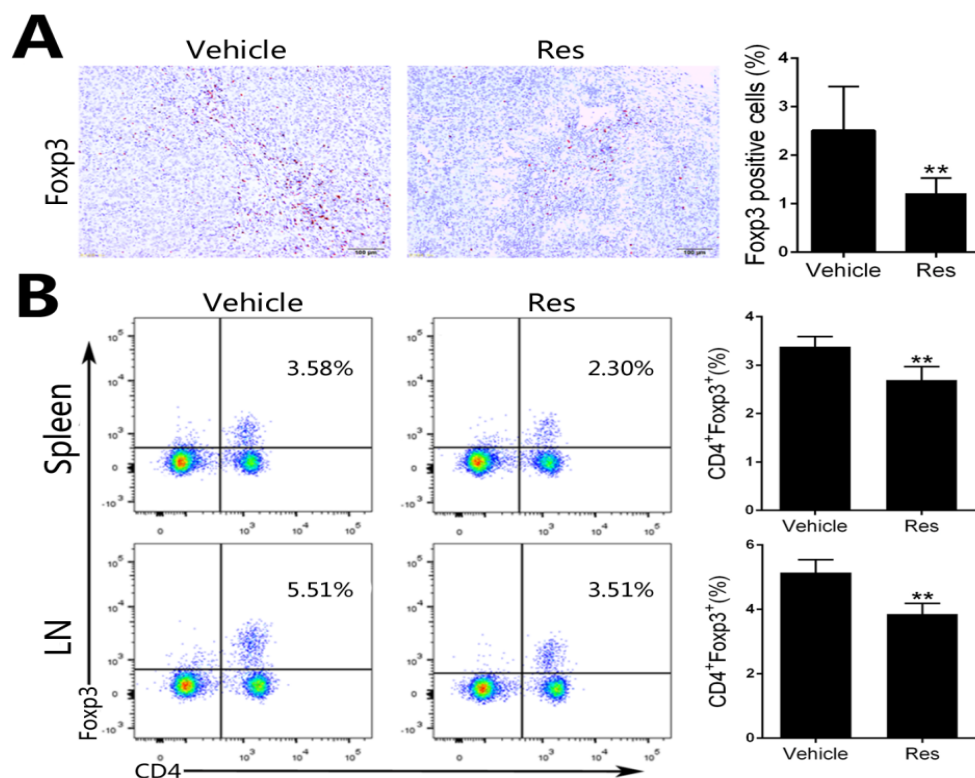

**Figure S1. Resveratrol treatment reduces the frequency of CD4<sup>+</sup> Foxp3<sup>+</sup> Tregs in the tumor bearing mice.** (A) Immunohistochemical analysis of Foxp3 expression in the tumors derived from subcutaneous tumors of C57BL/6 mice. (B) Spleen and draining lymph node (LN) cells were isolated from C57BL/6 tumor-bearing mice 3 weeks after treatment with or without resveratrol. The frequencies of CD4<sup>+</sup>Foxp3<sup>+</sup> Tregs from spleen and LNs were enumerated by FACS analysis. Data of column graphs are presented as

mean  $\pm$  SD (Res, resveratrol; n = 4-6 mice/group; two-tailed *t*-test: **\*\**p* < 0.01**). One of three separate experiments is shown.

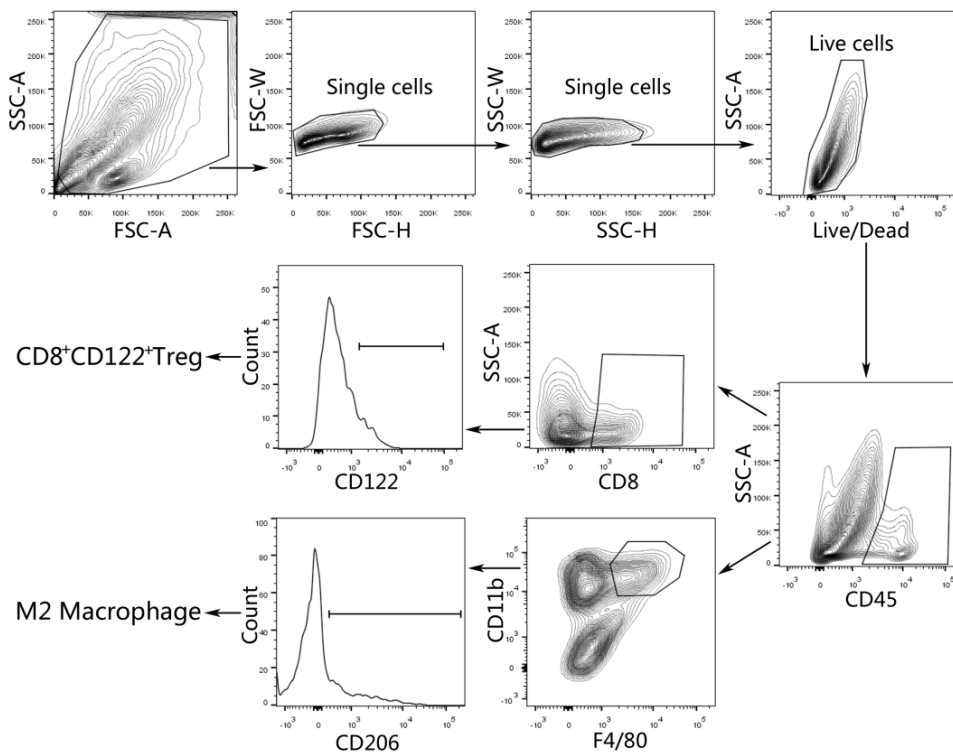

**Figure S2. Gating strategy used for intratumoral CD8<sup>+</sup>CD122<sup>+</sup> Tregs and M2 macrophages. FACS gating strategy of CD8<sup>+</sup> CD122<sup>+</sup> Tregs is shown for Fig. 2A, 5D and 7D, while that of M2 macrophages is also presented for Fig. 3A and 7F.**

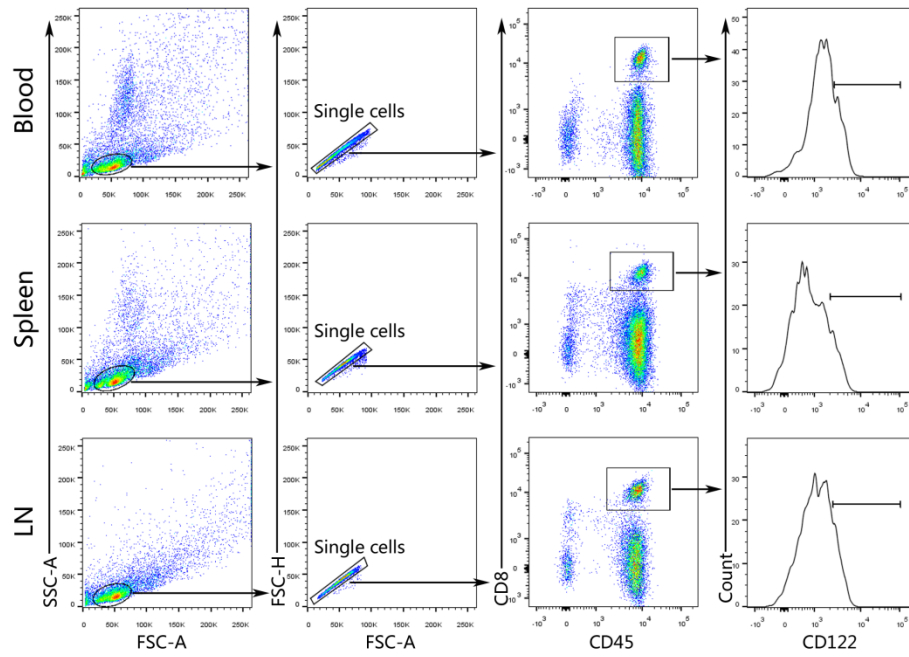

**Figure S3. Gating strategy for CD8<sup>+</sup> CD122<sup>+</sup> Tregs in the circulation.** FACS gating strategy of CD8<sup>+</sup> CD122<sup>+</sup> Tregs from blood, spleen and draining lymph nodes (LNs) is shown for Fig. 2B, 5E and 7E.

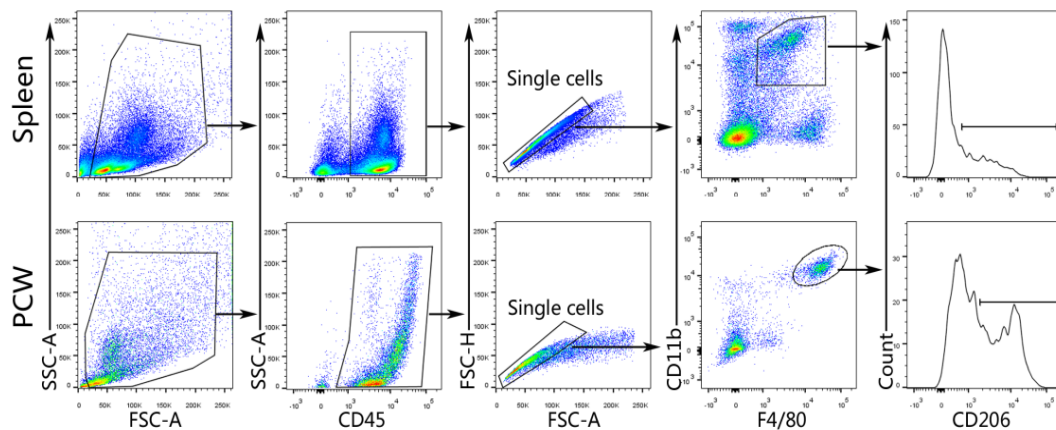

**Figure S4. Gating strategy for M2 macrophages.** FACS gating strategy of M2 macrophages derived from peritoneal cavity washes (PCW) and spleen is shown for Fig. 3C and 7F.

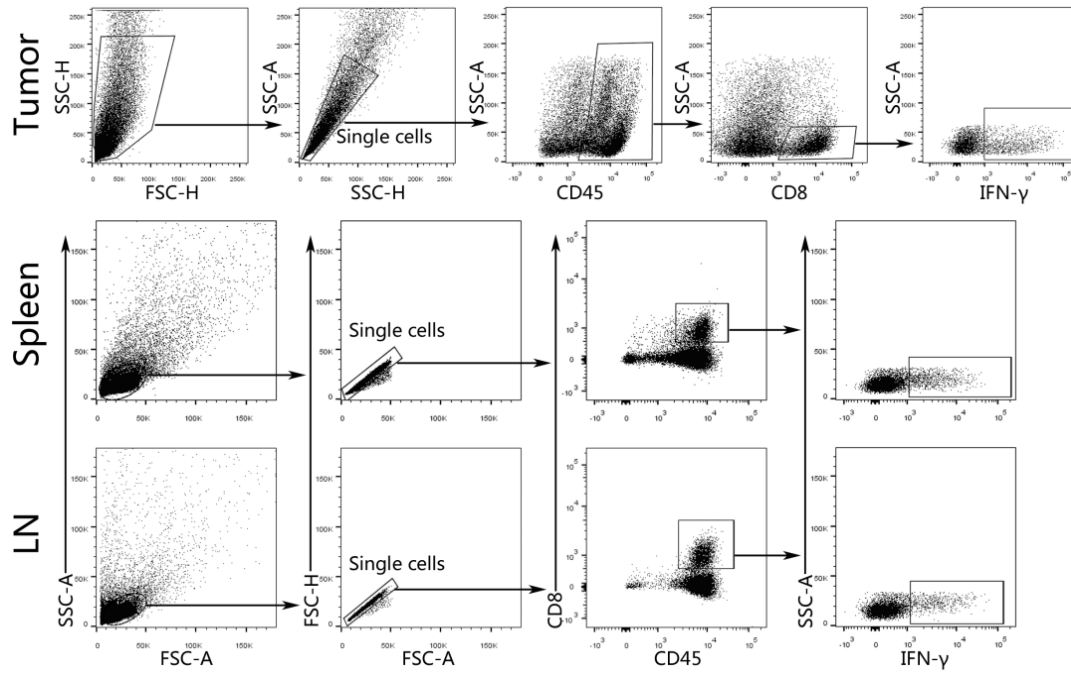

**Figure S5. Gating strategy for CD8<sup>+</sup>IFN- $\gamma$ <sup>+</sup> T cells in different tissues.** FACS gating strategy for CD8<sup>+</sup>IFN- $\gamma$ <sup>+</sup> T cells derived from tumor, spleen and draining lymph nodes (LNs) is shown for [Fig. 4](#).
